# Supplementary material
Source: HighWire-hosted journal article supplement (https://bmjopen.bmj.com/content/7/3/e012567)
Supplement: inline-supplementary-material-1 [file inline-supplementary-material-1.pdf]

## **Appendix 1. MEDLINE search strategy**

- #1 randomized controlled trial [pt]
- #2 controlled clinical trial [pt]
- #3 randomized [tiab]
- #4 placebo [tiab]
- #5 clinical trials as topic [mesh: noexp]
- #6 randomly [tiab]
- #7 trial [ti]
- #8 #1 OR #2 OR #3 OR #4 OR #5 OR #6 OR #7
- #9 animals [mh] NOT humans [mh]
- #10 #8 NOT #9
- #11 TNF- $\alpha$  antagonist OR etanercept OR adalimumab OR infliximab OR golimumab  
OR certolizumab
- #12 #10 AND #11

## Appendix 2. Screening for tuberculosis (TB) and incidence of TB in the included studies

| First Author                | Screening for TB (methods)     | Treatment group(n=7912) |                 | Control group(n=3967) |                 |
|-----------------------------|--------------------------------|-------------------------|-----------------|-----------------------|-----------------|
|                             |                                | Events                  | No. of patients | Events                | No. of patients |
| Ho-Youn KIM <sup>16</sup>   | Yes (not mentioned)            | 1                       | 65              | 0                     | 63              |
| Rutgeerts <sup>17</sup>     | Yes (chest radiograph and PPD) | 1                       | 243             | 0                     | 121             |
| Baranauskaite <sup>18</sup> | Yes (not mentioned)            | 1                       | 57              | 0                     | 58              |
| Barker <sup>19</sup>        | Yes (not mentioned)            | 1                       | 653             | 0                     | 215             |
| Braun <sup>20</sup>         | Yes (not mentioned)            | 1                       | 35              | 0                     | 35              |
| Breedveld <sup>21</sup>     | Yes (PPD)                      | 1                       | 542             | 0                     | 257             |
| Chen <sup>22</sup>          | Yes (chest radiograph)         | 1                       | 35              | 0                     | 12              |
| Colombel <sup>23</sup>      | Yes (chest radiograph and PPD) | 1                       | 338             | 0                     | 170             |
| Couriel <sup>24</sup>       | Yes (chest radiograph)         | 1                       | 29              | 2                     | 28              |
| Judson <sup>25</sup>        | Yes (not mentioned)            | 1                       | 55              | 0                     | 58              |
| Kavanaugh <sup>26</sup>     | Yes (PPD)                      | 1                       | 515             | 0                     | 517             |
| Kennedy <sup>27</sup>       | Yes (QuantiFeron)              | 1                       | 85              | 0                     | 44              |
| Keystone <sup>28</sup>      | Yes (not mentioned)            | 1                       | 419             | 0                     | 200             |
| Keystone <sup>29</sup>      | Yes (chest radiograph and PPD) | 5                       | 783             | 0                     | 199             |
| Maini <sup>30</sup>         | Yes (not mentioned)            | 1                       | 340             | 0                     | 88              |
| Nam <sup>31</sup>           | Yes (not mentioned)            | 1                       | 55              | 0                     | 57              |
| Reich <sup>32</sup>         | Yes (chest X-ray and PPD)      | 1                       | 117             | 0                     | 59              |
| Schiff <sup>33</sup>        | No                             | 2                       | 328             | 0                     | 318             |
| Schiff <sup>34</sup>        | Yes (chest X-ray and PPD)      | 2                       | 165             | 0                     | 110             |
| Sieper <sup>35</sup>        | Yes (chest X-ray and PPD)      | 1                       | 106             | 0                     | 52              |
| Smolen <sup>36</sup>        | Yes (chest X-ray and PPD)      | 5                       | 492             | 0                     | 127             |

**Cont'd**

| First Author                  | Screening for TB (methods)     | Treatment group(n=7912) |                 | Control group(n=3967) |                 |
|-------------------------------|--------------------------------|-------------------------|-----------------|-----------------------|-----------------|
|                               |                                | Events                  | No. of patients | Events                | No. of patients |
| St Clair <sup>37</sup>        | Yes (not mentioned)            | 4                       | 751             | 0                     | 298             |
| Suzuki <sup>38</sup>          | Yes (chest X-ray and PPD)      | 1                       | 177             | 0                     | 96              |
| Tam <sup>39</sup>             | No                             | 1                       | 20              | 0                     | 20              |
| Van Den Bosch <sup>40</sup>   | Yes (chest radiograph)         | 1                       | 20              | 0                     | 20              |
| van der Heijde <sup>41</sup>  | Yes (not mentioned)            | 1                       | 454             | 0                     | 228             |
| van Vollenhoven <sup>42</sup> | Yes (not mentioned)            | 1                       | 79              | 0                     | 76              |
| Wenzel <sup>43</sup>          | No                             | 1                       | 233             | 0                     | 78              |
| Westhovens <sup>44</sup>      | Yes (chest radiograph and PPD) | 4                       | 721             | 1                     | 363             |

PPD: Purified Protein Derivative.

### Appendix 3. Risk of bias summary: review authors' evaluation about each risk of bias item for each included study

|                      | Random sequence generation (selection bias) | Allocation concealment (selection bias) | Blinding of participants and personnel (performance bias) | Blinding of outcome assessment (detection bias) | Incomplete outcome data (attrition bias) | Selective reporting (reporting bias) | Other bias |
|----------------------|---------------------------------------------|-----------------------------------------|-----------------------------------------------------------|-------------------------------------------------|------------------------------------------|--------------------------------------|------------|
| Baranauskaite 2012   | ?                                           | ?                                       | +                                                         | +                                               | +                                        | +                                    | +          |
| Barker 2011          | +                                           | +                                       | +                                                         | +                                               | +                                        | +                                    | +          |
| Braun 2002           | +                                           | +                                       | +                                                         | +                                               | +                                        | +                                    | +          |
| Breedveld 2006       | ?                                           | ?                                       | +                                                         | +                                               | +                                        | +                                    | +          |
| Chen 2009            | ?                                           | ?                                       | +                                                         | +                                               | +                                        | +                                    | +          |
| Colombel 2010        | ?                                           | ?                                       | +                                                         | +                                               | +                                        | +                                    | +          |
| Couriel 2009         | ?                                           | ?                                       | +                                                         | +                                               | +                                        | +                                    | +          |
| Ho-Youn KIM 2007     | ?                                           | ?                                       | +                                                         | +                                               | +                                        | +                                    | +          |
| Judson 2014          | +                                           | +                                       | +                                                         | +                                               | +                                        | +                                    | +          |
| Kavanaugh 2013       | +                                           | +                                       | +                                                         | +                                               | +                                        | +                                    | +          |
| Kennedy 2014         | ?                                           | ?                                       | +                                                         | +                                               | +                                        | +                                    | +          |
| Keystone 2004        | ?                                           | ?                                       | +                                                         | +                                               | +                                        | +                                    | +          |
| Keystone 2008        | ?                                           | ?                                       | +                                                         | +                                               | +                                        | +                                    | +          |
| Maini 1999           | ?                                           | ?                                       | +                                                         | +                                               | +                                        | +                                    | +          |
| Nam 2014             | +                                           | +                                       | +                                                         | +                                               | +                                        | +                                    | +          |
| Reich 2012           | +                                           | +                                       | +                                                         | +                                               | +                                        | +                                    | +          |
| Rutgeerts 2005       | +                                           | +                                       | +                                                         | +                                               | +                                        | +                                    | +          |
| Schiff 2008          | ?                                           | ?                                       | +                                                         | +                                               | +                                        | +                                    | +          |
| Schiff 2014          | ?                                           | ?                                       | +                                                         | +                                               | +                                        | +                                    | +          |
| Sieper 2014          | +                                           | +                                       | +                                                         | +                                               | +                                        | +                                    | +          |
| Smolen 2009          | ?                                           | ?                                       | +                                                         | +                                               | +                                        | +                                    | +          |
| St Clair 2004        | +                                           | +                                       | +                                                         | +                                               | +                                        | +                                    | +          |
| Suzuki 2014          | +                                           | ?                                       | +                                                         | +                                               | +                                        | +                                    | +          |
| Tam 2012             | +                                           | +                                       | +                                                         | +                                               | +                                        | +                                    | +          |
| Van Den Bosch 2002   | +                                           | +                                       | +                                                         | +                                               | +                                        | +                                    | +          |
| van der Heijde 2007  | +                                           | +                                       | +                                                         | +                                               | +                                        | +                                    | +          |
| van Vollenhoven 2011 | +                                           | ?                                       | +                                                         | +                                               | +                                        | +                                    | +          |
| Wenzel 2009          | +                                           | +                                       | +                                                         | +                                               | +                                        | +                                    | +          |
| Westhovens 2006      | ?                                           | ?                                       | +                                                         | +                                               | +                                        | +                                    | +          |

#### Appendix 4. Funnel plot for RCTs included in this meta-analysis

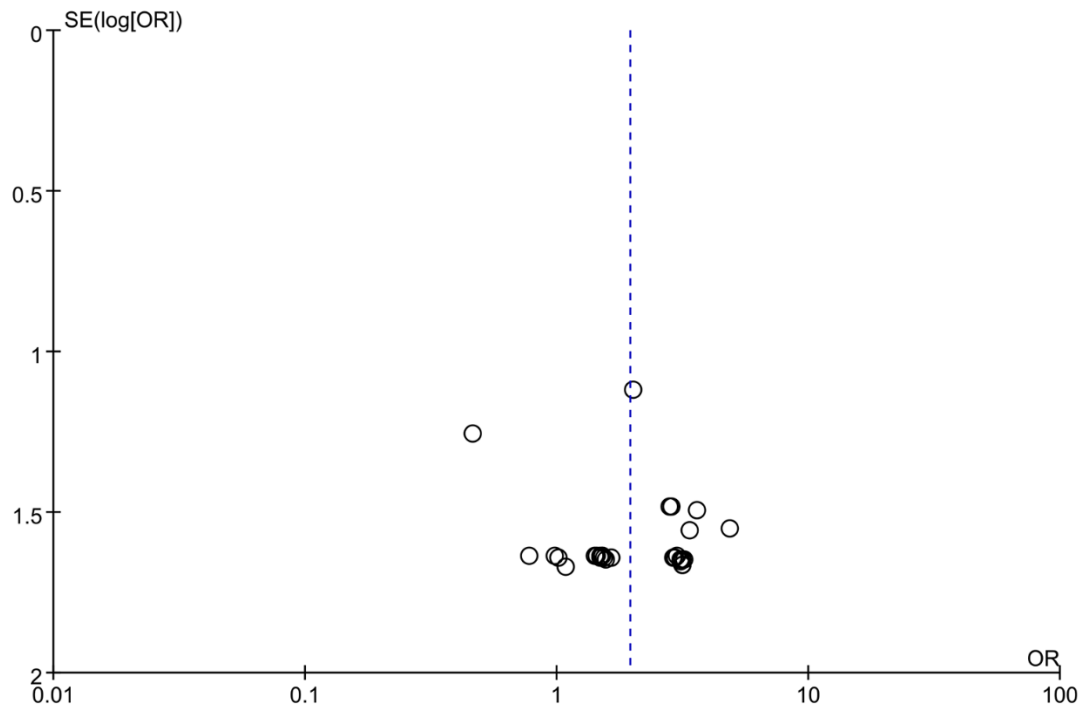

## Appendix 5. Sensitivity analysis of the influence of each individual study on the pooled ORs by omitting individual studies

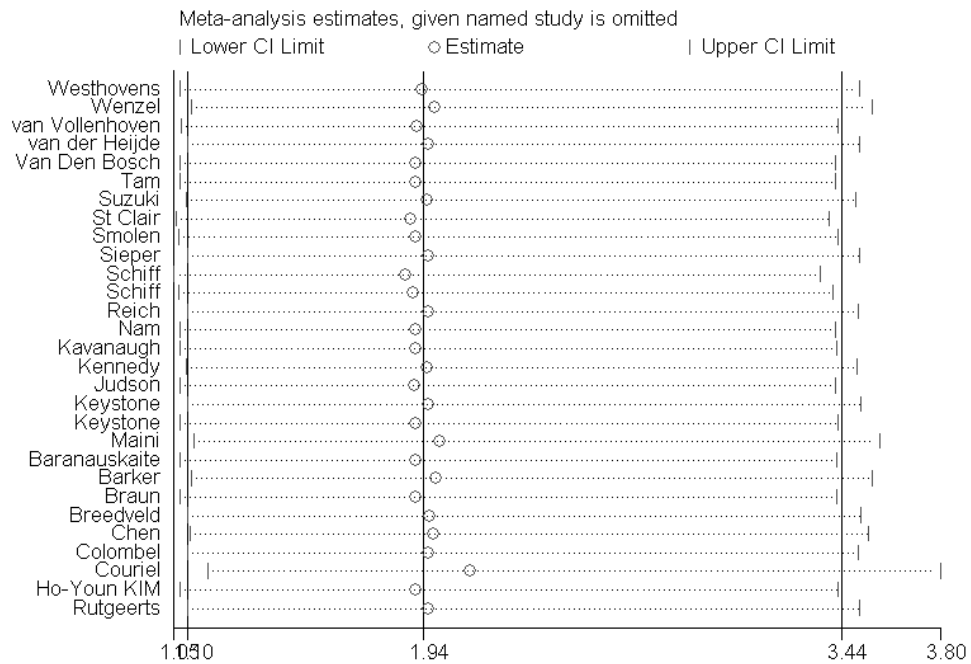

## Appendix 6. Subgroup analysis of TB risk of IFX, ADA and CZP

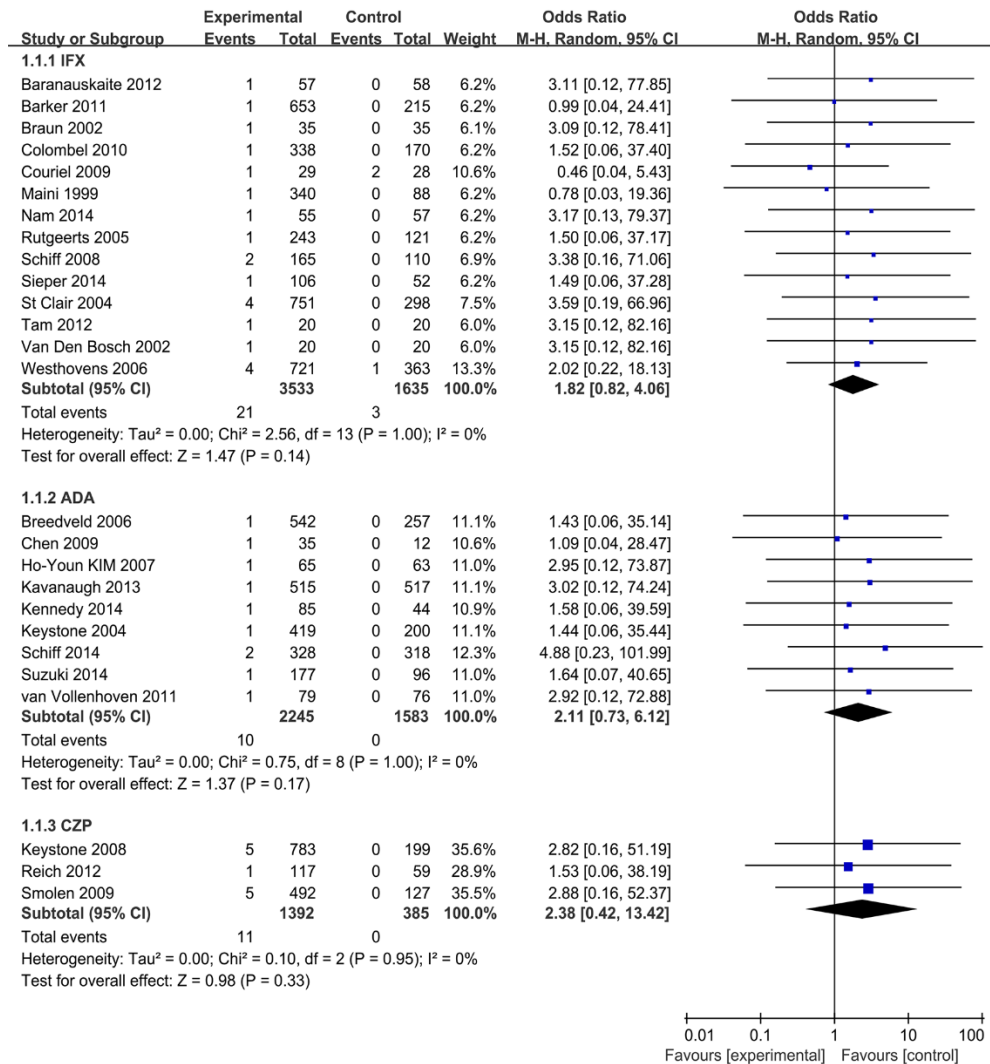

## Appendix 7. GRADE assessment of tuberculosis risk associated with TNF- $\alpha$ antagonists

| Quality assessment         |                   |              |                          |                         |             |                      | No of patients            |                | Effect               |                                         | Quality     | Importance |
|----------------------------|-------------------|--------------|--------------------------|-------------------------|-------------|----------------------|---------------------------|----------------|----------------------|-----------------------------------------|-------------|------------|
| No of studies              | Design            | Risk of bias | Inconsistency            | Indirectness            | Imprecision | Other considerations | TNF- $\alpha$ antagonists | Control        | Relative (95% CI)    | Absolute                                |             |            |
| Outcome: tuberculosis risk |                   |              |                          |                         |             |                      |                           |                |                      |                                         |             |            |
| 29                         | Randomized trials | serious      | no serious inconsistency | no serious indirectness | serious     | none                 | 45/7912 (0.57%)           | 3/3967 (0.08%) | OR 1.94 (1.10, 3.44) | 1 more per 1000 (from 0 more to 2 more) | ⊕⊕○○<br>LOW | IMPORTANT  |
